# Supplementary material
Source: ML conference proceedings conference paper supplement (https://openreview.net/forum?id=EX1drMVwl3O)

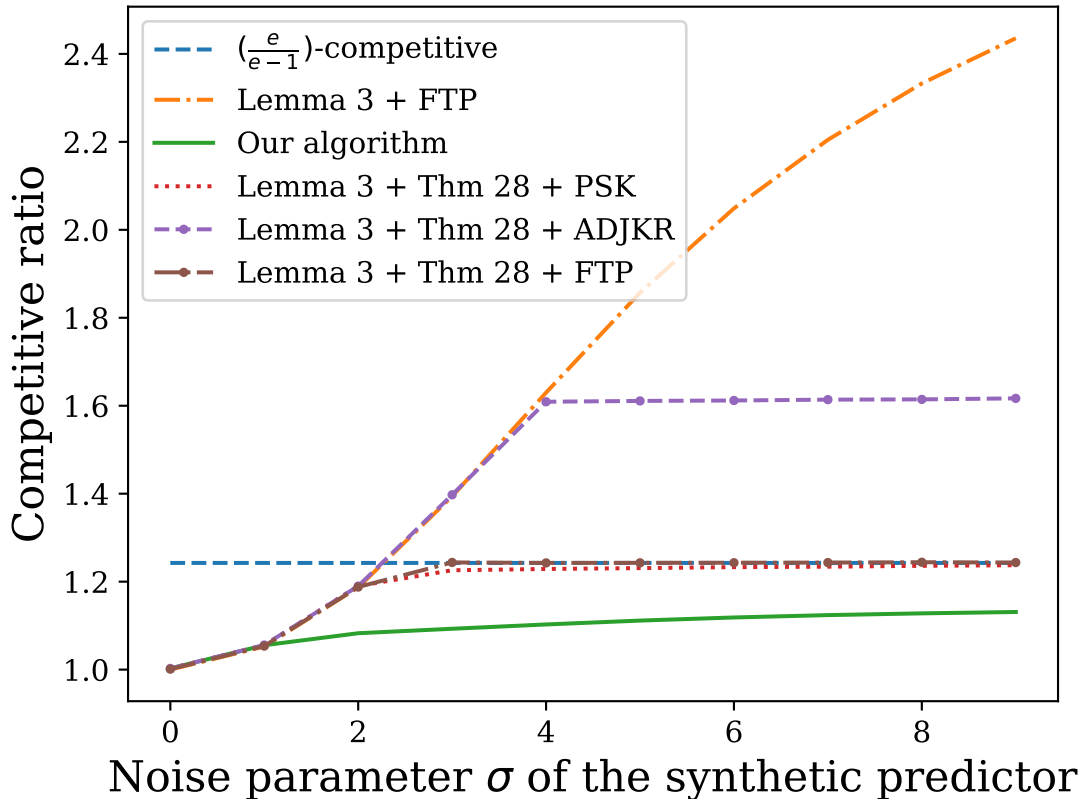

Supplement: supplementary_material [file attachment]

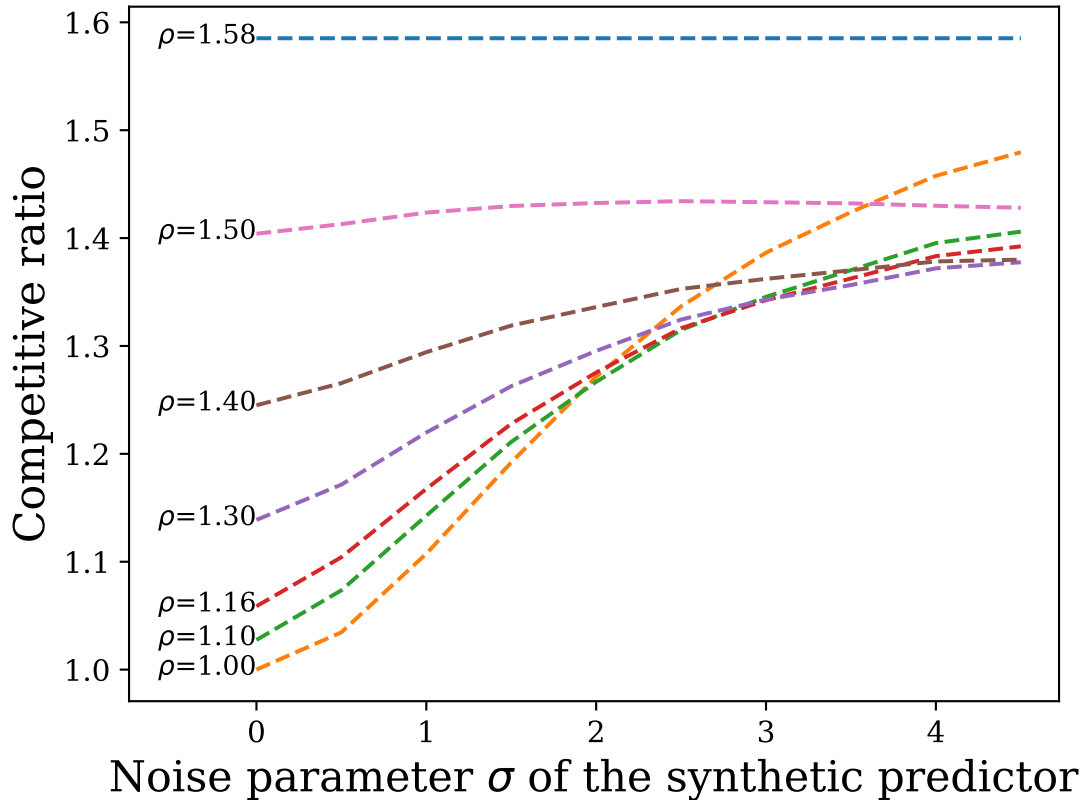

Supplement: supplementary_material [file attachment]

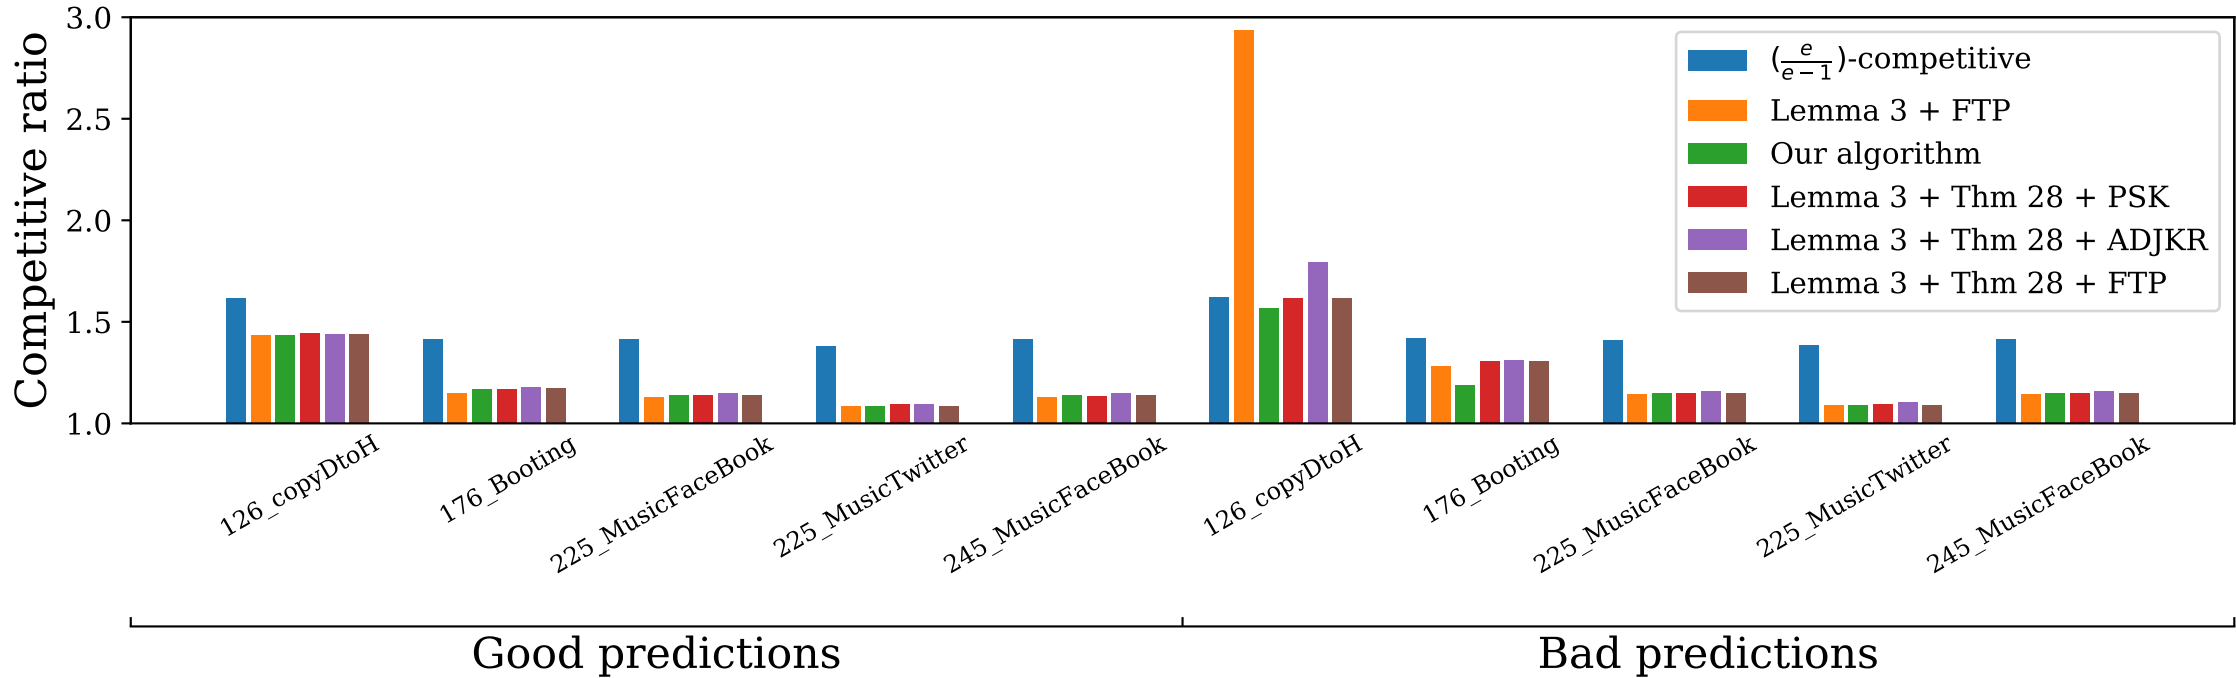

Supplement: supplementary_material [file attachment]

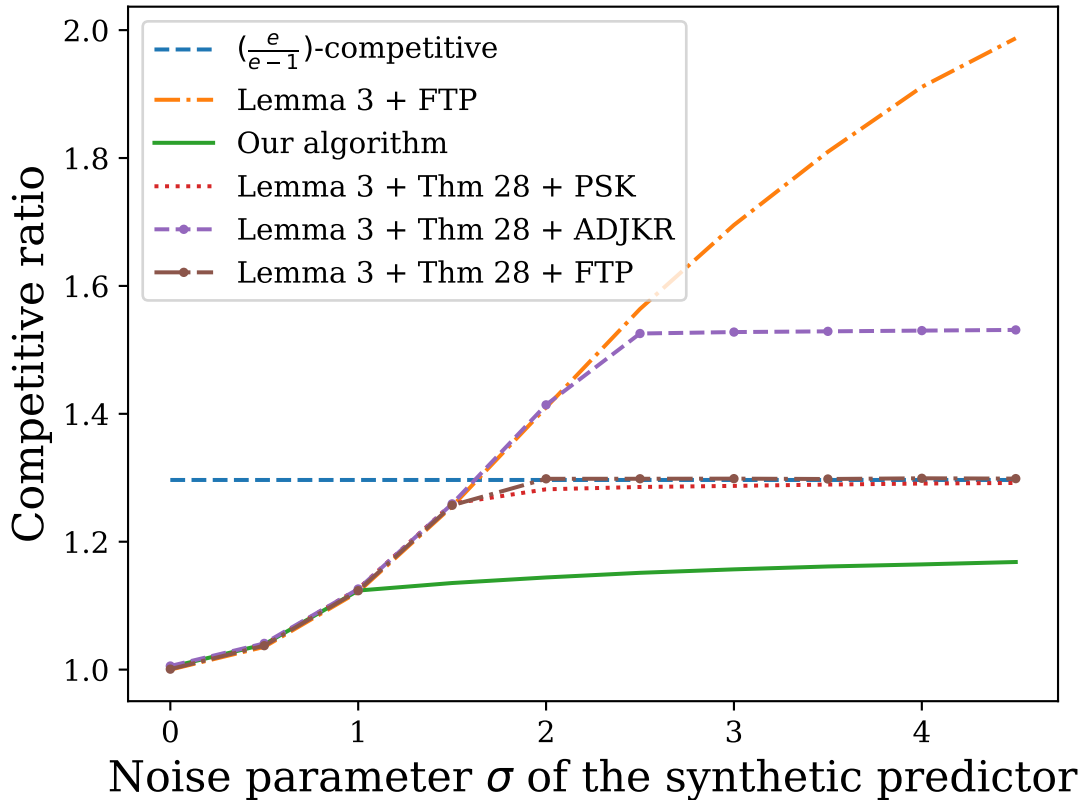

Supplement: supplementary_material [file attachment]

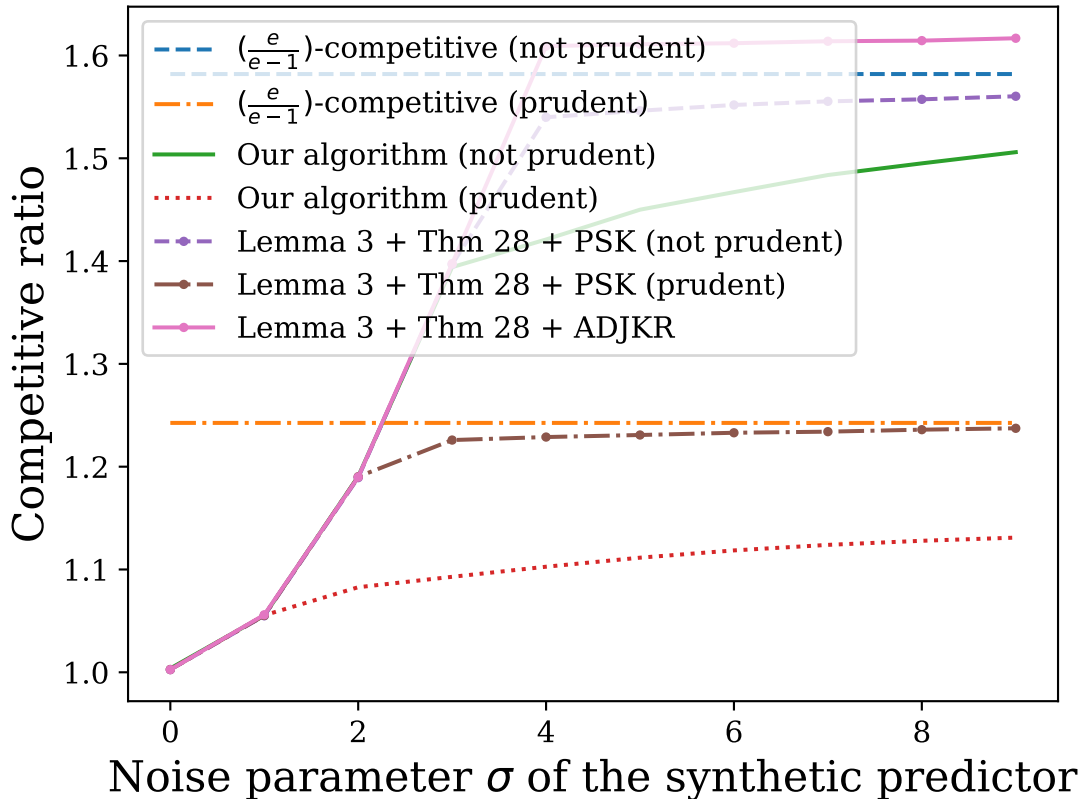

Supplement: supplementary_material [file attachment]

Competitive ratio

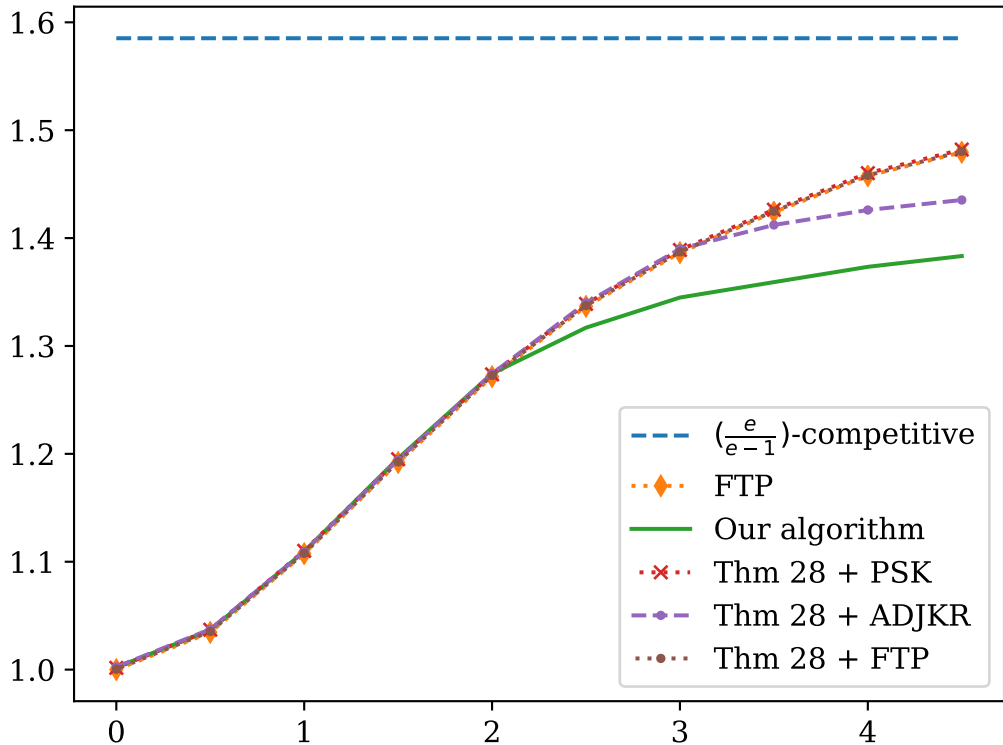

Noise parameter  $\sigma$  of the synthetic predictor

Supplement: supplementary_material [file attachment]

Competitive ratio

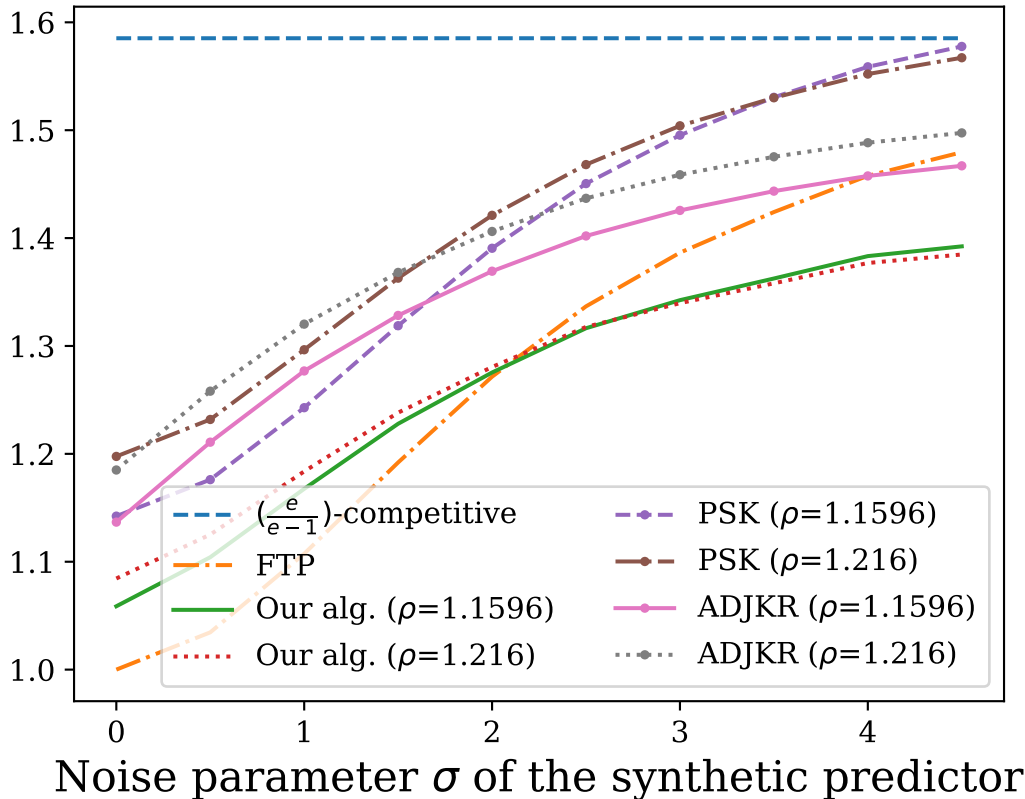

Supplement: supplementary_material [file attachment]
